# Supplementary material
Source: ML conference proceedings conference paper supplement (https://proceedings.mlr.press/v139/tillinghast21a.html)
Supplement: Supplementary file [file tillinghast21a-supp.pdf]

# Supplementary Materials

| Mode 1 | Mode 2 | Mode 3 | Value |
|--------|--------|--------|-------|
| 1      | 1      | 1      | 2.1   |
| 1      | 1      | 2      | 1.2   |
| 2      | 2      | 3      | -3.3  |

(a)

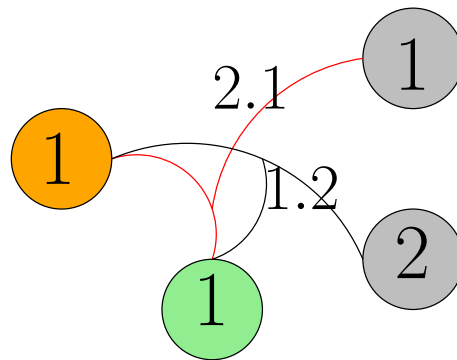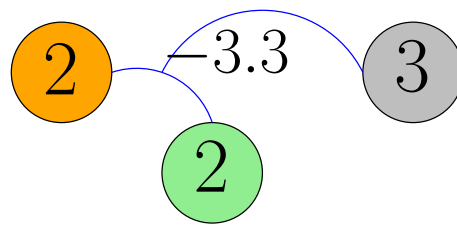

(b)

Figure 1: Hypergraph representation of a sparse  $2 \times 2 \times 3$  tensor. Nodes in different codes represent different modes. Each (hyper-)edge represents an existent entry, where the edge weight is the entry value.

# 1 Sparse Tensor Models

## 1.1 Completely Random Measures and Gamma Processes

A completely random measure (Kingman, 1967, 1992; Lijoi et al., 2010)  $\mu$  on a  $\mathbf{R}_+^d$  is a random variable that takes values in the space of measures on  $\mathbf{R}_+^d$  such that for any collection of disjoint subsets  $A_1, \dots, A_n \subset \mathbf{R}_+^d$ , the random variables  $\mu(A_1), \dots, \mu(A_n)$  are independent. This independence condition has the implication that CRMs are discrete measures. That is,

$$\mu = \sum_{i=1}^{\infty} w_i \delta_{\theta_i}. \quad (1)$$

The theory of CRMs is intimately connected to Poisson Point Processes (PPP). We can characterize CRMs by the mean measure of a PPP. If  $(w_i, \theta_i) \in (\mathbf{R}_+, \mathbf{R}_+^d)$  has the distribution of a Poisson Point Process with intensity (mean) measure  $\nu(dw d\theta)$ , then the resulting discrete measure is a CRM. If we assume that the weights are independent of the locations in the CRM, the measure  $\nu$  can be decomposed as  $\nu(dw d\theta) = \rho(w) \mu_0(d\theta)$ .

A Gamma process (Hougaard, 1986; Brix, 1999) with the base measure  $\mu_0$ , denoted by  $\Gamma P(\mu_0)$ , is the CRM that arises when

$$\nu(dw d\theta) = w^{-1} e^{-w} dw \mu_0(d\theta).$$

Since

$$\int w^{-1} e^{-w} dw = \infty$$

for any measurable subset  $\Theta \subset \mathbf{R}_+^d$  with  $\mu_0(\Theta) > 0$ , the  $\Gamma P$  will have an infinite number of atoms (locations). This is why in our sparse tensor process where we set  $\mu_0 = \lambda_\alpha$ , the Lebesgue measure with support restricted to  $[0, \alpha]^d$ , we still generate an infinite number of nodes in each mode (see (2) in the main paper). However when the PPP with the product of  $\Gamma P$ s as the mean measure is sampled to generate tensor entries, only a finite number of those nodes in each mode become active, because the the number of entries is finite (with probability one); see Sec. 3.1 of the main paper for more details.

Now suppose  $g \sim \Gamma P(\mu_0)$ , then it can be shown  $g(\Theta)$  follows a Gamma distribution with the shape parameter  $\mu_0(\theta)$  for any measurable  $\Theta \subset \mathbf{R}_+^d$ . This implies that if  $\mu_0$  is a finite measure, then  $g(\mathbf{R}_+^d)$  is finite almost surely and  $g/g(\mathbf{R}_+^d)$  is a well defined probability measure. Furthermore,

$$g/g(\mathbf{R}_+^d) \sim \text{DP}(\mu_0(\mathbf{R}_+^d), \mu_0/\mu_0(\mathbf{R}_+^d))$$

where DP is a Dirichlet process with the strength  $\mu_0(\mathbf{R}_+^d)$  and base probability measure  $\mu_0/\mu_0(\mathbf{R}_+^d)$ .

## 1.2 Sparsity

Now we will prove Lemma 3.1 and Corollary 3.1.1. Our sparse tensor process is summarized as

$$\begin{aligned} W_k^\alpha &\sim \Gamma P(\lambda_\alpha) (1 \leq k \leq K), \\ T &\sim \text{PPP}(W_1^\alpha \times \dots \times W_K^\alpha). \end{aligned} \quad (2)$$

We will first list a few lemmas the will be important to finish the proof.

**Lemma 1.1** (Campbell's Theorem (Kingman, 1992)). *Let  $\Pi$  be a Poisson Process on  $S$  with mean measure  $\nu$  and suppose  $f : S \rightarrow \mathbf{R}$  is a measurable function, then*

$$\mathbb{E} \left[ \sum_{x \in \Pi} f(x) \right] = \int_S f(x) \nu(dx).$$

**Lemma 1.2** (Caron and Fox, 2014) Lemma 17). *Let  $\mu$  be a random almost surely positive measure on  $\mathbf{R}^+$  and let*

$$N|\mu \sim \text{PoissonPoint}(\mu).$$

Define  $\hat{N}_t = N[0, t]$  and  $\hat{\mu}_t = \mu([0, t])$  then

$$\hat{N}_t|\mu \sim \text{Poisson}(\hat{\mu}_t).$$

Furthermore if  $\hat{\mu}_t \rightarrow \infty$  and  $\lim_{t \rightarrow \infty} \frac{\hat{\mu}_{t+1}}{\hat{\mu}_t} = 1$ , then

$$\frac{\hat{N}_t}{\hat{\mu}_t} \rightarrow 1 \text{ a.s.}$$

**Lemma 1.3** (Poisson Superposition Theorem (Cinlar and Agnew, 1968)). *Suppose  $\Pi_1$  and  $\Pi_2$  are Poisson point process on  $S$  with mean measure  $\mu_1$  and  $\mu_2$  respectively. Then  $\Pi_1 + \Pi_2$  is a Poisson point process on  $S$  with mean measure  $\mu = \mu_1 + \mu_2$*

**Lemma 1.4** (Marking Theorem (Kingman, 1993)). *Let  $\Pi$  be a Poisson process on  $S$  with mean measure  $\mu$ . Suppose for each  $X \in \Pi$  we associate a mark  $m_X \in M$  from a distribution  $p_x(\cdot)$ , that may depend on  $X$  but not other points. Then the cartesian product  $\{(X, m_X)|X \in \Pi\}$  is a Poisson process on  $S \times M$  with mean measure  $\mu(dx)p_x(dm)$ .*

### 1.2.1 Proof of Lemma 3.1 and Corollary 3.1.1

We will prove Lemma 3.1 in two steps. For simplicity we will assume  $\lambda_\alpha$  is the Lebesgue measure on  $[0, \alpha]$  and  $\lambda$  is the Lebesgue measure on  $[0, \infty]$ . The extension to the Lebesgue measure on  $[0, \alpha]^d$  is straightforward.

It follows from the properties of the GP that if  $W^\infty \sim \Gamma\text{P}(\lambda)$  and if  $W^\alpha \sim \Gamma\text{P}(\lambda_\alpha)$  then the distribution of the measure  $W^\infty$  restricted to  $[0, \alpha]$  is identical to  $W^\alpha$ . Thus instead of generating a new CRM for  $W^\alpha$  each time with  $\alpha$  increased, we assume the same CRM,  $W^\infty$  is restricted to the growing set  $[0, \alpha]$ .

Let  $M_k^\alpha$  be the number of active nodes in mode  $k$  and let  $N^\alpha$  be the number of entries. Let

$$A_{k, \theta_i^k}^\alpha = [0, \alpha] \times \cdots \times \{\theta_i^k\} \times \cdots \times [0, \alpha].$$

Then we have

$$M_k^\alpha = \#\{\theta_i^k \in [0, \alpha] | T(A_{k, \theta_i^k}^\alpha) > 0\}.$$

In the first step, we will show  $\lim_{\alpha \rightarrow \infty} \frac{\alpha}{M_k^\alpha} = 0$  a.s. for all  $k \in \{1, \dots, K\}$ . Then in the second step, we will show that  $\limsup_{\alpha \rightarrow \infty} N^\alpha / \alpha^K < \infty$  a.s. Together this implies

$$\lim_{\alpha \rightarrow \infty} \frac{N^\alpha}{\prod_{k=1}^K M_k^\alpha} = 0 \text{ a.s.}$$

because

$$\frac{N^\alpha}{\prod_{k=1}^K M_k^\alpha} = \frac{N^\alpha}{\alpha^K} \prod_{k=1}^K \frac{\alpha}{M_k^\alpha}.$$

**Step 1.** First note that  $T(A_{k,\theta_i^k}^\alpha) | \{W_k^\infty\}_{k=1}^K$  has a Poisson distribution so

$$\Pr(T(A_{k,\theta_i^k}^\alpha) > 0 | \{W_k^\infty\}_{k=1}^K) = 1 - \exp\left(-W_k^\infty(\{\theta_i^k\}) \times \prod_{j \neq k} W_j^\infty([0, \alpha])\right).$$

Additionally, the set of points  $\{T(A_{k,\theta_i^k}^\alpha) > 0\}_i$  can be interpreted as random binary marks on the Gamma process  $W_k^\infty$  when conditioned on  $\{W_j^\infty\}_{j \neq k}$ . Hence, according to the Poisson marking theorem (Lemma 1.4), the marked Gamma process  $\{(\theta_i^k, T(A_{k,\theta_i^k}^\alpha) > 0)\}$  conditioned on  $\{W_j^\infty\}_{j \neq k}$  is generated by a Poisson point process on  $\mathbb{R}_+ \times \mathbb{R}_+ \times \{0, 1\}$ . Thus  $M_k^\alpha | \{W_i^\infty([0, \alpha])\}_{i \neq k}$  is a Poisson random variable. We compute the expectation of  $M_k^\alpha$  given the  $\Gamma$ Ps of the other modes to characterize the distribution of  $M_k^\alpha | \{W_i^\infty\}_{i \neq k}$ . Using the law of total expectation, we have

$$\begin{aligned} \mathbb{E}[M_k^\alpha | \{W_j^\infty\}_{j \neq k}] &= \mathbb{E}\left[\sum_{\theta_i \in [0, \alpha]} \mathbb{1}(T(A_{k,\theta_i^k}^\alpha) > 0) \mid \{W_j^\infty\}_{j \neq k}\right] \\ &= \mathbb{E}\left[\sum_{\theta_i \in [0, \alpha]} \mathbb{E}[\mathbb{1}(T(A_{k,\theta_i^k}^\alpha) > 0) | \{W_k^\infty\}_{k=1}^K] \mid \{W_j^\infty\}_{j \neq k}\right] \\ &= \mathbb{E}\left[\sum_{\theta_i \in [0, \alpha]} 1 - \exp\left(-W_k^\infty(\{\theta_i^k\}) \times \prod_{j \neq k} W_j^\infty([0, \alpha])\right) \mid \{W_j^\infty\}_{j \neq k}\right]. \end{aligned}$$

For the expectation, because  $(\theta_i^k, w_i^k)$  is a Poisson process due to the construction of the CRM, we can apply Lemma 1.1. Together this gives

$$\begin{aligned} &\mathbb{E}[M_k^\alpha | \{W_j^\infty([0, \alpha])\}_{j \neq k}] \\ &= \int_0^\infty \int_0^\infty \left(1 - \exp\left(-w \times \prod_{j \neq k} W_j^\infty([0, \alpha])\right)\right) w^{-1} e^{-w} dw d\lambda_\alpha \\ &= \alpha \int_0^\infty \left(1 - \exp\left(-w \times \prod_{i \neq k} W_i^\infty([0, \alpha])\right)\right) w^{-1} e^{-w} dw. \end{aligned}$$

Let

$$\psi(t) = \int_0^\infty (1 - \exp(-wt)) w^{-1} e^{-w} dw,$$

then our work shows

$$M_k^\alpha | \{W_j^\infty\}_{j \neq k} \sim \text{Poisson}\left(\alpha \cdot \psi\left(\prod_{j \neq k} W_j^\infty([0, \alpha])\right)\right).$$

As  $W_j^\infty([0, \alpha])$  is Gamma distributed with shape parameter  $\alpha$ ,  $\lim_{\alpha \rightarrow \infty} W_j^\alpha([0, \alpha]) = \infty$  a.s. We also have  $\lim_{t \rightarrow \infty} \psi(t) = \infty$ . This follows immediately from the monotone convergence theorem as  $\int_0^\infty w^{-1} e^{-w} dw = \infty$ . Together this implies

$$\lim_{\alpha \rightarrow \infty} \frac{\alpha \psi \left( \prod_{j \neq k} W_j^\infty([0, \alpha]) \right)}{\alpha} = \infty \text{ a.s.} \quad (3)$$

Applying Lemma 1.2 the Poisson process with mean measure,  $\tau$  where  $\tau([a, b]) = b\psi \left( \prod_{i \neq k} W_i^\infty([0, b]) \right) - a\psi \left( \prod_{i \neq k} W_i^\infty([0, a]) \right)$  then implies

$$Pr \left( \lim_{\alpha \rightarrow \infty} \frac{M_k^\alpha}{\alpha \cdot \psi \left( \prod_{i \neq k} W_i^\alpha([0, \alpha]) \right)} = 1 \middle| \{W_i^\infty\}_{i \neq k} \right) = 1.$$

Taking the expectation on both sides of the above expression implies

$$\lim_{\alpha \rightarrow \infty} \frac{M_k^\alpha}{\alpha \cdot \psi \left( \prod_{i \neq k} W_i^\alpha([0, \alpha]) \right)} = 1 \text{ a.s.}$$

Combining the above with with equation (3) completes the first step and implies

$$\lim_{\alpha \rightarrow \infty} \frac{\alpha}{M_k^\alpha} = 0 \text{ a.s.}$$

**Step 2.** As it is possible for the point process to sample more than one point at a single location, the number of points generated from the point process may not equal to the number of (distinct) tensor entries. Let  $D^\alpha$  be the actual number of points sampled. Note  $N^\alpha < D^\alpha$ .

Now consider  $j \in \mathbb{N}$  and  $D^j = T([0, j]^K)$ . We have

$$D^j | \{W_1^\infty, \dots, W_K^\infty\} \sim \text{Poisson} \left( \prod_{k=1}^K W_k^\infty([0, j]) \right).$$

By the independence of the CRM on disjoint sets, it follows immediately by the strong law of large numbers

$$\lim_{j \rightarrow \infty} \frac{W_k^\infty([0, j])}{j} = \frac{\sum_{i=1}^j W_k^\infty((i-1, i])}{j} = E[W_k^\infty([0, 1])] = 1 \text{ a.s.}$$

as  $W_k^\infty((i-1, i])$  are *i.i.d* Gamma random variables. This implies

$$\lim_{j \rightarrow \infty} \frac{\prod_{k=1}^K W_k^\infty([0, j])}{j^K} = 1 \text{ a.s.} \quad (4)$$

But applying Lemma 1.2 implies

$$Pr \left( \lim_{j \rightarrow \infty} \frac{D^j}{\prod_{k=1}^K W_k^j([0, j])} = 1 \middle| \{W_i^\infty\}_{i=1}^K \right) = 1$$

Taking the expectation of both sides of the above expression and combining with equation (4) implies

$$\lim_{j \rightarrow \infty} \frac{D^j}{j^K} = 1 \text{ a.s.}$$

The above only holds for natural numbers. To extend to real numbers note for any  $\alpha$ , there exists,  $j \in \mathbb{N}$  such that  $j \leq \alpha \leq j + 1$ . Thus

$$\frac{j^K}{(j+1)^K} \frac{D^j}{j^K} \leq \frac{D^\alpha}{\alpha^k} \leq \frac{(j+1)^K}{j^K} \frac{D^{j+1}}{(j+1)^K},$$

so taking  $\alpha \rightarrow \infty$  proves

$$\lim_{\alpha \rightarrow \infty} \frac{D^\alpha}{\alpha^K} = 1.$$

Recalling  $N^\alpha \leq D^\alpha$  completes the proof.

**Proof of Corollary 3.1.1** By the Lemma 1.3 (Poisson superposition theorem)

$$T \sim \text{PPP}\left(\sum_{r=1}^R W_{1,r}^\alpha \times \cdots \times W_{K,r}^\alpha\right)$$

can be constructed as

$$T = \sum_{r=1}^R \text{PPP}(W_{1,r}^\alpha \times \cdots \times W_{K,r}^\alpha).$$

Now lemma 3.1 applies to each of the individual Poisson processes which implies the result.

## References

- Brix, A. (1999). Generalized gamma measures and shot-noise cox processes. *Advances in Applied Probability*, pages 929–953.
- Caron, F. and Fox, E. B. (2014). Sparse graphs using exchangeable random measures. *arXiv preprint arXiv:1401.1137*.
- Cinlar, E. and Agnew, R. (1968). On the superposition of point processes. *Journal of the Royal Statistical Society. Series B (Methodological)*, pages 576–581.
- Hougaard, P. (1986). Survival models for heterogeneous populations derived from stable distributions. *Biometrika*, 73(2):387–396.
- Kingman, J. (1967). Completely random measures. *Pacific Journal of Mathematics*, 21(1):59–78.
- Kingman, J. (1992). *Poisson Processes*, volume 3. Clarendon Press.
- Kingman, J. F. C. (1993). *Poisson processes*, volume 3 of *Oxford Studies in Probability*. The Clarendon Press Oxford University Press, New York. Oxford Science Publications.
- Lijoi, A., Prünster, I., et al. (2010). Models beyond the Dirichlet process. *Bayesian nonparametrics*, 28(80):342.
